# Supplementary material
Source: Springer Nature journal article supplement (https://www.springermedizin.de/resource/supplementary/12913_2010_1536_MOESM1_ESM.pdf/9528740)
Supplement: MOESM1 [file 9528740]

## Patients

**Poor health status**

(age, complexity of treatment)

**Economic incentives**

(deductible, out of pocket)

## Physicians

**Regions** (cantons)

**Practice** (GPs, hospital, specialists)

**Generic  
use**

+

-

+

+/-

+/-

-

**Size of the market**

number of generics and patients

**Diversification**

(packaging, galenic, etc.)

**Nature of the treatment**

298 substitution groups

**Pharmaceutical market**
